# Supplementary material for: An AI model to estimate visual acuity based solely on cross-sectional OCT imaging of various diseases
Source: Springer Nature journal article supplement (doi:10.1007/s00417-023-06054-9), 2023-05-11
Supplement: MOESM5 [file 25345864]

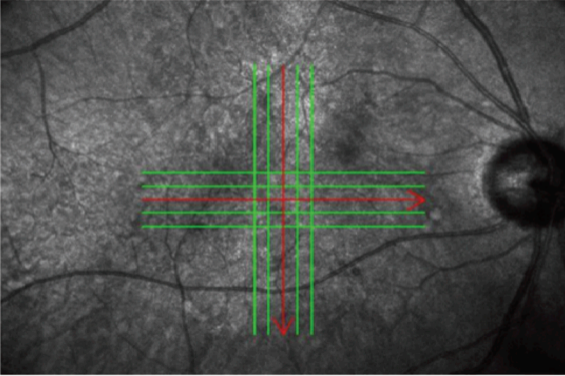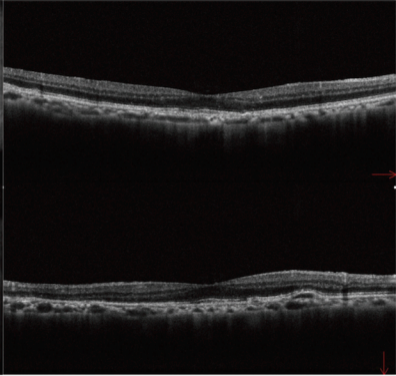

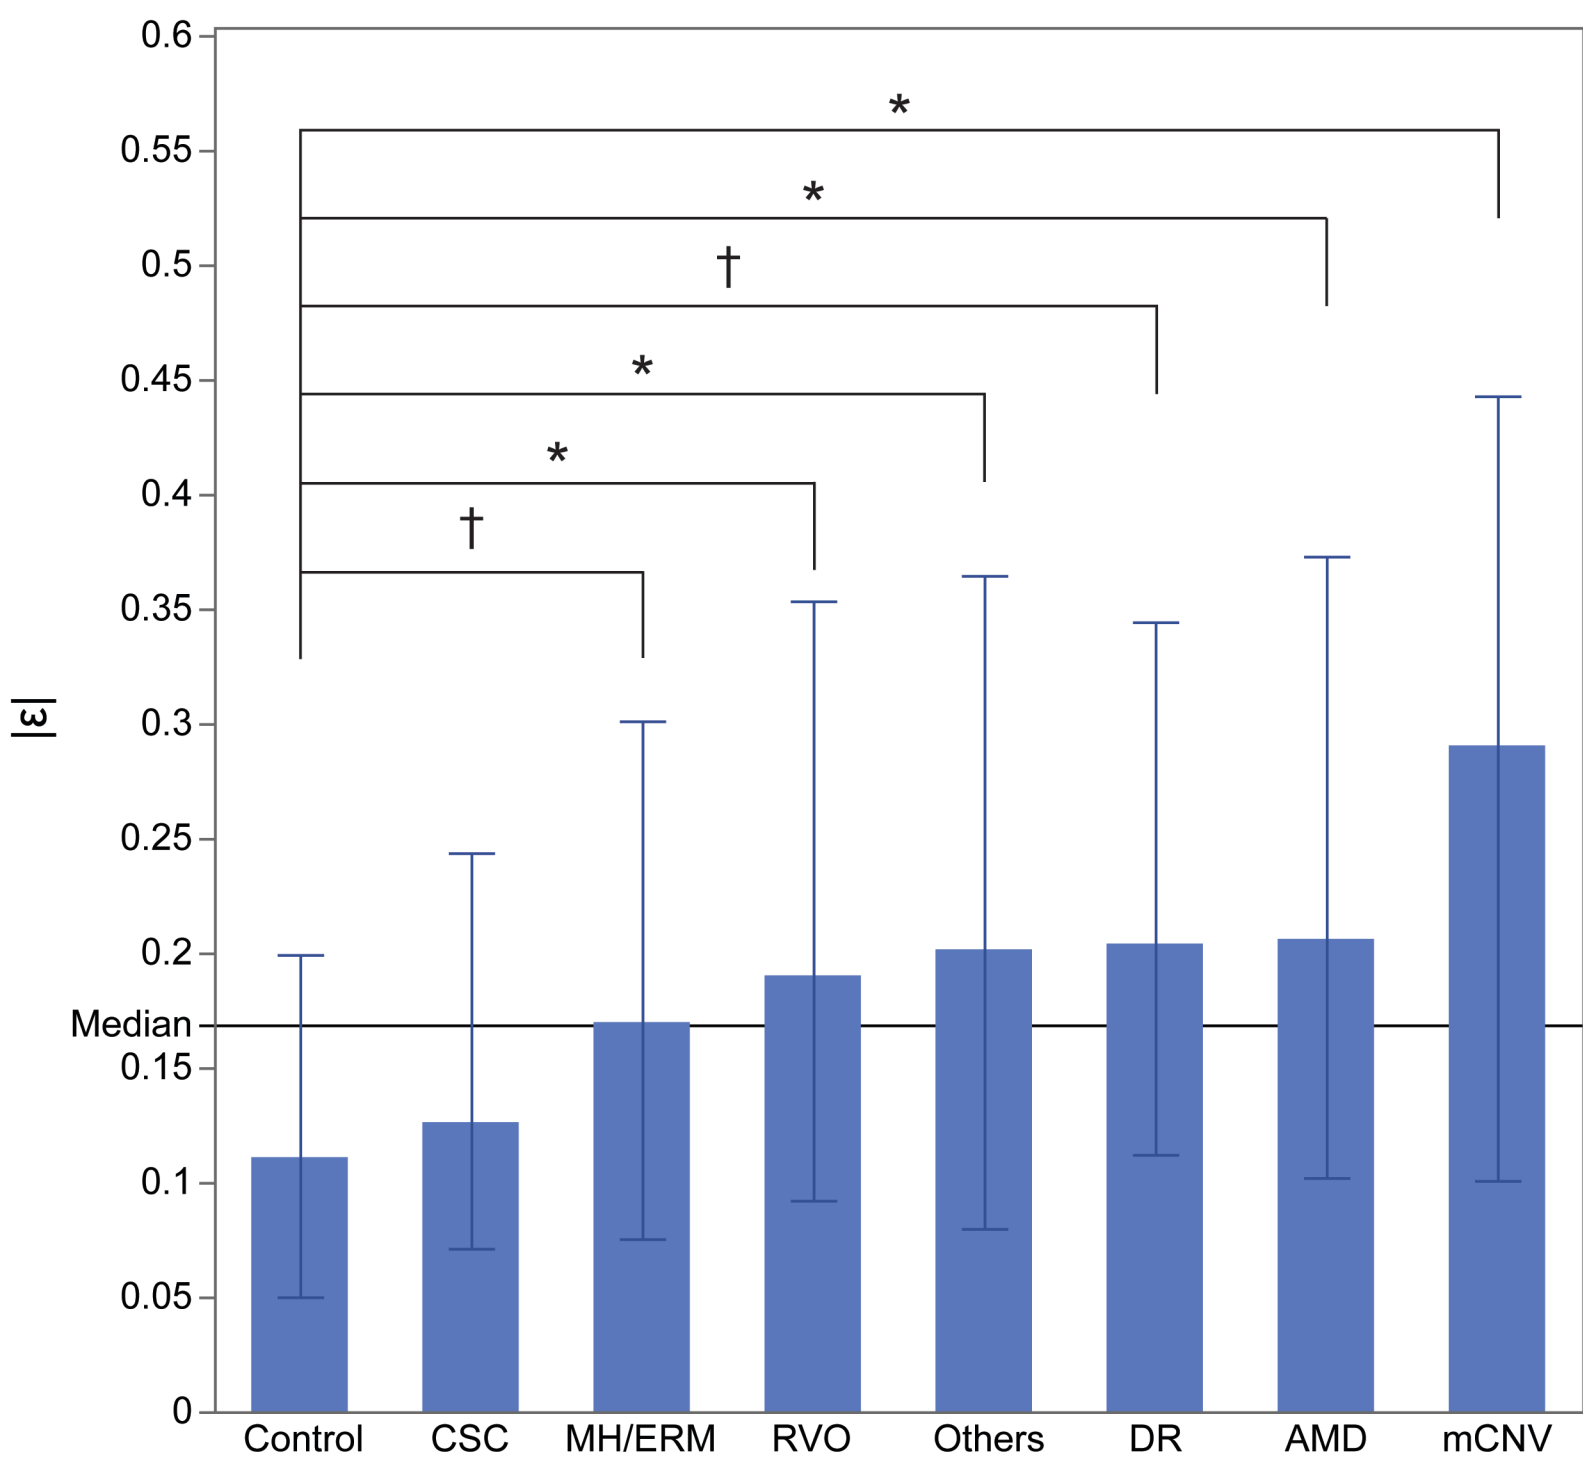

**An AI model to estimate visual acuity based solely on cross-sectional OCT imaging of vario**

**Graefes Arch Clin Exp Ophthalmol**

Satoru Inoda, Hidenori Takahashi, Yusuke Arai, Hironobu Tampo, Yoshitsugu Matsui, Hidetoshi Kawashima, and Yasuo Yanagi

Corresponding author: Hidenori Takahashi

Department of Ophthalmology, Jichi Medical University

E-mail: takahah-tky@umin.ac.jp
